# Supplementary material
Source: PubMed Central journal article supplement (PMC6119132)
Supplement: 2017.186742.SALLMAN_SUPPL.pdf [file 2017.186742.SALLMAN_SUPPL.pdf]

**NKG2D-based chimeric antigen receptor therapy induced remission in a relapsed/refractory acute myeloid leukemia patient**

David A. Sallman,<sup>1</sup> Jason Brayer,<sup>1</sup> Elizabeth M. Sagatys,<sup>2</sup> Caroline Lonez,<sup>3</sup> Eytan Breman,<sup>3</sup> Sophie Agaugué,<sup>3</sup> Bikash Verma,<sup>4</sup> David E. Gilham,<sup>3</sup> Frédéric F. Lehmann<sup>3</sup> and Marco L Davila<sup>5</sup>

<sup>1</sup>Malignant Hematology and <sup>2</sup>Hematopathology and Laboratory Medicine, H. Lee Moffitt Cancer Center and Research Institute, Tampa, FL, USA; <sup>3</sup>Celyad, SA, Mont-Saint-Guibert, Belgium; <sup>4</sup>Celyad, SA, New York, NY, USA and <sup>5</sup>Blood & Marrow Transplantation and Cellular Immunotherapy, H. Lee Moffitt Cancer Center and Research Institute, Tampa, FL, USA

DAS and JB contributed equally to this work.

Correspondence: David.Sallman@moffitt.org or Marco.Davila@moffitt.org  
doi:10.3324/haematol.2017.186742

**Supplementary information for:**

**NKG2D-based chimeric antigen receptor therapy induced remission in a relapsed/refractory acute myeloid leukemia patient.**

**Authors and affiliations**

David A. Sallman<sup>1\*</sup>, Jason Brayer<sup>1\*</sup>, Elizabeth M. Sagatys<sup>2</sup>, Caroline Loney<sup>3</sup>, Eytan Breman<sup>3</sup>, Sophie Agaugué<sup>3</sup>, Bikash Verma<sup>4</sup>, David E. Gilham<sup>3</sup>, Frédéric F. Lehmann<sup>3</sup>, Marco L Davila<sup>5</sup>

<sup>1</sup>Malignant Hematology and <sup>2</sup>Hematopathology and Laboratory Medicine, H. Lee Moffitt Cancer Center and Research Institute, Tampa, FL, USA

<sup>3</sup> Celyad, SA, Mont-Saint-Guibert, Belgium

<sup>4</sup> Celyad, SA, New York, NY, USA

<sup>5</sup>Blood & Marrow Transplantation and Cellular Immunotherapy, H. Lee Moffitt Cancer Center and Research Institute, Tampa, FL, USA

\*These authors contributed equally to this work.

## Supplementary Figures

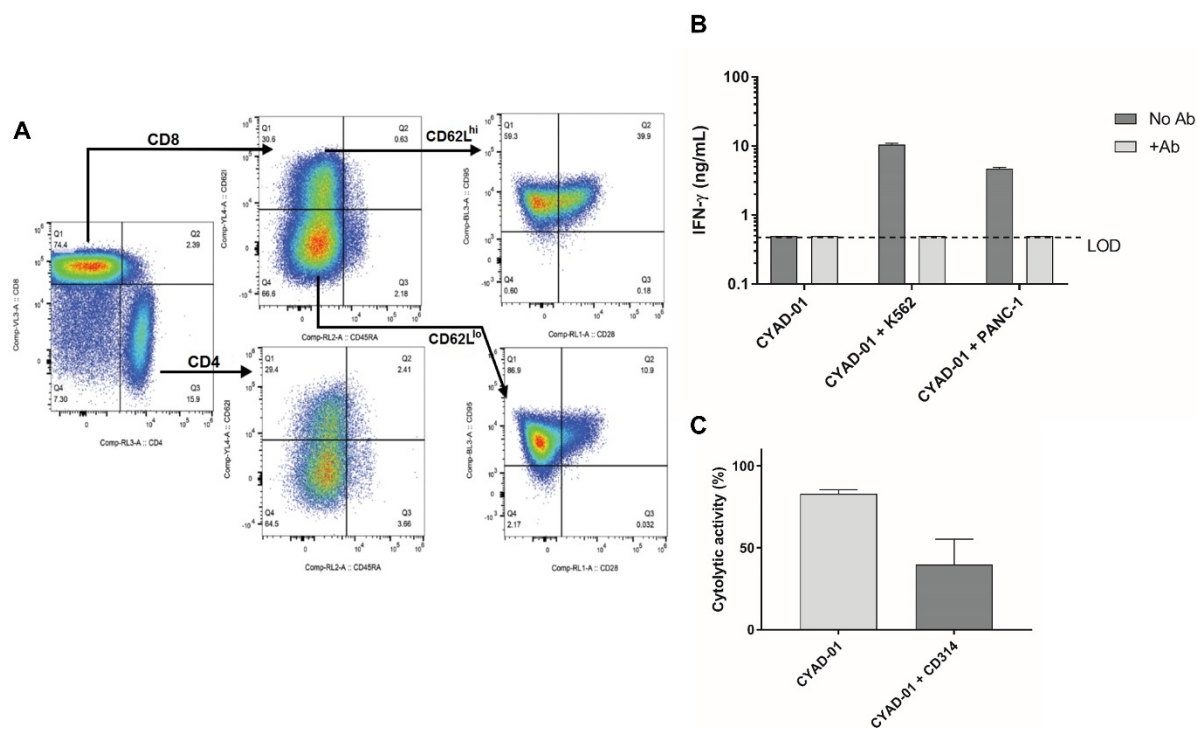

**Fig. S1: Patient's CYAD-01 phenotype and *in vitro* functionality.** (A) A sample of the infusion product was analyzed for cell subset composition and memory phenotype. CD3<sup>+</sup> viable singlet cells showed a high CD8 preponderance with both CD4 and CD8 subsets possessing a majority of CD62L<sup>lo</sup> phenotype. As shown in the CD8 subset, both CD62L<sup>hi</sup> and CD62L<sup>lo</sup> populations were CD95<sup>+</sup> and CD28<sup>lo</sup>. Together this suggests the infusion product to be composed primarily of CD8<sup>+</sup> T cells that possess an effector memory phenotype. 88% of the CD4<sup>+</sup> T cells and 94% of the CD8<sup>+</sup> T cells were NKG2D<sup>+</sup>. (B) Patient's CYAD-01 product was incubated in the presence or absence of NKG2D blocking antibody (CD314 Ab) (light and dark grey bars, respectively) with PANC-1 and K562 cancer cells (at a 1:1 ratio). After 24h of incubation, supernatants were harvested and analyzed for IFN- $\gamma$  secretion. Dotted line represents the limit of detection (LOD). Each bar represents the mean and SD of one experiment conducted at least in duplicate, \*\*\*\*:  $p < 0.001$ . (C) Patient's CYAD-01 cells were cultured at a 1:1 ratio with PANC-1 cells in the presence or absence of CD314 blocking Ab. After a 20h

incubation the CYAD-01 cells were washed away and the remaining PANC-1 cells stained with AlamarBlue to quantify the remaining proliferating PANC-1 cells. Each bar represents one experiment conducted in triplicate with the corresponding SD, \*:  $p < 0.05$ .

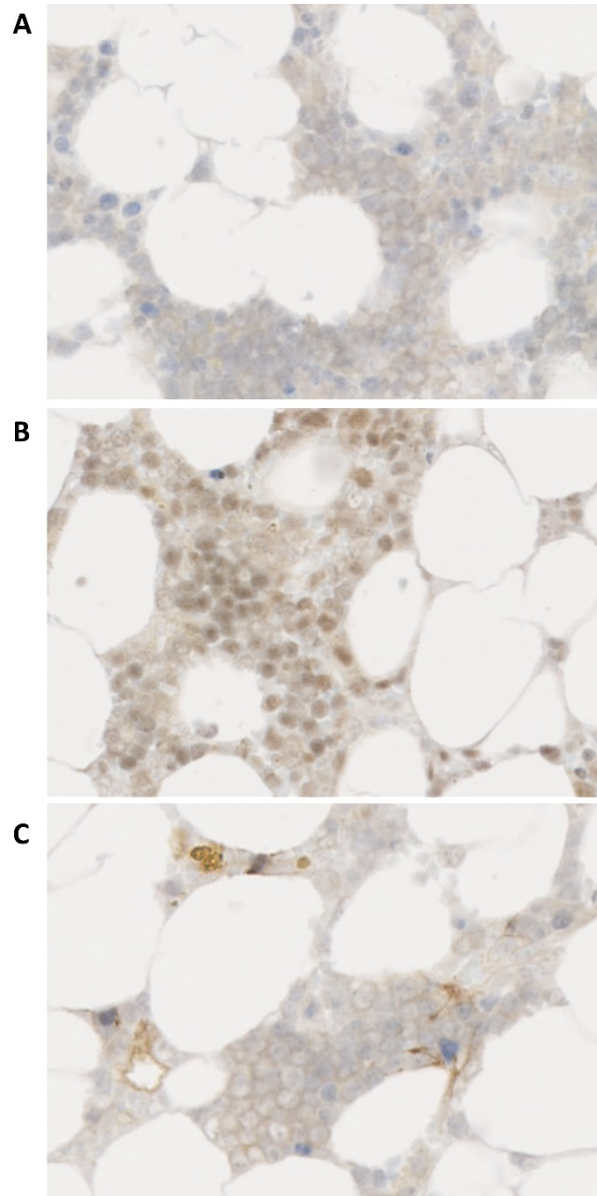

**Fig. S2: Immunohistochemistry analysis of NKG2D ligand expression in bone marrow sample taken before first CYAD-01 injection.** One BM biopsy was subject to a range of IHC staining protocols specific for the following NKG2DL: MICA/MICB, ULBP1, ULBP2/5/6, ULBP3. In addition, a sample of each was prepared applying standard hematoxylin and eosin (H&E) staining (data not shown). All samples were examined and graded by light microscopy. Representative stainings of ULBP1 (A), ULBP2/5/6 (B) and ULBP3 (C). It has to be noted that ULBP2/5/6 are predominantly stained in the nucleus and that ULBP1, ULBP3 and MICA/B (Fig. 2B) display cytoplasmic staining as well.

## 1 **Supplementary Methods**

### 2 **Study THINK design**

3 The THINK (**TH**erapeutic **I**mmunotherapy with **NKR-2**) trial is an open-label Phase I study  
4 which primarily aims to assess the safety and clinical activity of the CYAD-01 treatment  
5 administered three times at 2 weeks intervals between each administration without prior  
6 lymphodepleting chemotherapy in patients with refractory or relapsing malignancies, including  
7 patients with metastatic or locally advanced colorectal cancer, urothelial carcinoma, triple-  
8 negative breast cancer, pancreatic cancer, recurrent epithelial ovarian and fallopian tube  
9 carcinoma, AML/MDS or MM. The study is split into two segments; a dose escalation segment  
10 evaluating three dose-levels ( $3 \times 10^8$ ,  $1 \times 10^9$  and  $3 \times 10^9$  cells/injection) to determine the  
11 recommended dose of CYAD-01 cells and an expansion phase to investigate the clinical activity  
12 across multiple tumor indications while extending the safety study.

### 13 **Manufacture of cell products**

14 CYAD-01 (previously known as NKR-2) refers to the viable cell population obtained after  
15 retroviral transduction of autologous T-cells with the NKG2D-based CAR. CYAD-01 will be  
16 supplied cryopreserved in bags containing a T-cell dose in accordance with the dose-level  
17 which is to be administered.

### 18 **Characterization of the patient CYAD-01**

19 CYAD-01 identity (% NKG2D on  $CD4^+$ ,  $CD4^+CD8^+$  and  $CD8^+$  T cells), purity (% viable  $CD3^+$ )  
20 and viability (with 7AAD dye) are assessed by flow cytometry. Cell yield is assessed by cell  
21 counting (excluding Trypan blue). In vitro product functionality/potency is evaluated by  
22 assessment of IFN- $\gamma$  secretion via ELISA and metabolic activity of tumor cells via Alamar Blue  
23 assay upon co-culture of CYAD-01 with NKG2D ligand-expressing tumor cells (Panc-1 cells

1 and /or K562). NKR-2 microbiological safety was confirmed by absence of microbiological  
2 growth, assessed by BactAlert, absence of mycoplasmas, assessed by qPCR based MycoTool  
3 assay, and compliant endotoxin level (<8.67 EU/ml), assessed by PTS EndoSafe LAL assay.  
4 Patient CYAD-01 met the product specifications. CYAD-01 phenotype identity (90%  
5 NKG2D<sup>+</sup>), purity (95% CD3<sup>+</sup>), viability (86%) and cell yield (300 x 10<sup>6</sup> cells), evidenced a  
6 viable, highly pure CD3<sup>+</sup>, NKG2D<sup>+</sup> product. Viral vector safety was evaluated by Vector copy  
7 number (VCN) and Replication copy number (RCR) qPCR-based assays. In vitro product  
8 functionality/potency was confirmed by IFN- $\gamma$  secretion and efficient cytotoxicity effect in  
9 response to NKG2DL on tumor cells.
